# Supplementary material for: Self-crosslink assisted synthesis of 3D porous branch-like Fe3O4/C hybrids for high-performance lithium/sodium-ion batteries
Source: Royal Society of Chemistry journal article supplement (doi:10.1039/c7ra09348a), 2017-01-01
Supplement: c7ra09348a1.pdf [file c7ra09348a1.pdf]

## Supporting information

### **Self-crosslink assisted synthesis of 3D porous branch-like Fe<sub>3</sub>O<sub>4</sub>/C hybrids for high-performance lithium/sodium-ion batteries**

*Ning Wang, Qinglei Liu\*, Yue Li, Jichao Chen, Jiajun Gu, Wang Zhang, and Di Zhang\**

State Key Laboratory of Metal Matrix Composites, Shanghai Jiao Tong University,  
800 Dongchuan Road, Shanghai, 200240, P.R. China

\*Corresponding authors. E-mail address: liuqinglei@sjtu.edu.cn (Q.L. Liu),  
zhangdi@sjtu.edu.cn (D. Zhang)

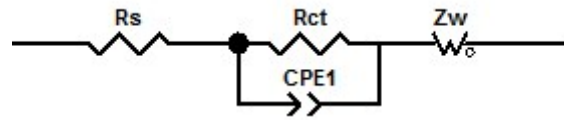

**Fig. S1.** The equivalent circuit used to simulate the EIS data.

**Table S1** The lithium storage performance of Fe<sub>3</sub>O<sub>4</sub>/C compared with previous works

| Fe <sub>3</sub> O <sub>4</sub> -based materials | Rate performance                                                                                       | Cycling performance                                            | Ref.      |
|-------------------------------------------------|--------------------------------------------------------------------------------------------------------|----------------------------------------------------------------|-----------|
| Fe <sub>3</sub> O <sub>4</sub> /C               | 974 mAh g <sup>-1</sup> at 0.1 A g <sup>-1</sup><br>/570 mAh g <sup>-1</sup> at 2 A g <sup>-1</sup>    | 200 cycles at 0.1 A g <sup>-1</sup><br>98% retention           | This work |
| Fe <sub>3</sub> O <sub>4</sub> -CNT             | 885 mAh g <sup>-1</sup> at 0.09 A g <sup>-1</sup><br>/529 mAh g <sup>-1</sup> at 1.8 A g <sup>-1</sup> | 100 cycles at 0.1 A g <sup>-1</sup><br>92% retention           | 1         |
| 3D Fe <sub>3</sub> O <sub>4</sub> @GS/GF        | 802 mAh g <sup>-1</sup> at 0.15 A g <sup>-1</sup><br>/363 mAh g <sup>-1</sup> at 4.8 A g <sup>-1</sup> | 150 cycles at 0.093 A g <sup>-1</sup><br>>100% retention       | 2         |
| G-Fe <sub>3</sub> O <sub>4</sub> -GNRs          | ~800 mAh g <sup>-1</sup> at 0.1 A g <sup>-1</sup><br>/~500 mAh g <sup>-1</sup> at 1 A g <sup>-1</sup>  | 300 cycles at 0.1 A g <sup>-1</sup><br>88.5% retention         | 3         |
| Fe <sub>3</sub> O <sub>4</sub> @mC              | 580 mAh g <sup>-1</sup> at 0.5 A g <sup>-1</sup><br>/271 mAh g <sup>-1</sup> at 10 A g <sup>-1</sup>   | 500 cycles at 2 A g <sup>-1</sup><br>>100% retention           | 4         |
| R-Fe <sub>3</sub> O <sub>4</sub> @C             | 920 mAh g <sup>-1</sup> at 0.1 A g <sup>-1</sup><br>/432 mAh g <sup>-1</sup> at 1 A g <sup>-1</sup>    | 100 cycles at 0.2 A g <sup>-1</sup><br>871 mAh g <sup>-1</sup> | 5         |
| GF@Fe <sub>3</sub> O <sub>4</sub>               | 780 mAh g <sup>-1</sup> at 1 A g <sup>-1</sup><br>/350 mAh g <sup>-1</sup> at 10 A g <sup>-1</sup>     | 500 cycles at 1 A g <sup>-1</sup><br>>100% retention           | 6         |
| Fe <sub>3</sub> O <sub>4</sub> @C@PGC           | 977 mAh g <sup>-1</sup> at 1 A g <sup>-1</sup><br>/311 mAh g <sup>-1</sup> at 20 A g <sup>-1</sup>     | 350 cycles at 10 A g <sup>-1</sup><br>96.5% retention          | 7         |
| Porous GN@C/Fe <sub>3</sub> O <sub>4</sub>      | 732 mAh g <sup>-1</sup> at 0.2 A g <sup>-1</sup><br>/330 mAh g <sup>-1</sup> at 5 A g <sup>-1</sup>    | 100 cycles at 0.1 A g <sup>-1</sup><br>87% retention           | 8         |
| Fe <sub>3</sub> O <sub>4</sub> /C NFs           | 982 mAh g <sup>-1</sup> at 0.1 A g <sup>-1</sup><br>/636 mAh g <sup>-1</sup> at 1 A g <sup>-1</sup>    | 300 cycles at 1 A g <sup>-1</sup><br>~100% retention           | 9         |
| Fe <sub>3</sub> O <sub>4</sub> @HCNS            | 1029 mAh g <sup>-1</sup> at 0.1 A g <sup>-1</sup><br>/290 mAh g <sup>-1</sup> at 10 A g <sup>-1</sup>  | 200 cycles at 1 A g <sup>-1</sup><br>>100% retention           | 10        |
| G-Fe <sub>3</sub> O <sub>4</sub> @C             | 860 mAh g <sup>-1</sup> at 0.1 A g <sup>-1</sup><br>/460 mAh g <sup>-1</sup> at 2 A g <sup>-1</sup>    | 100 cycles at 0.1 A g <sup>-1</sup><br>90% retention           | 11        |
| Fe <sub>3</sub> O <sub>4</sub> hollow spheres   | 992 mAh g <sup>-1</sup> at 1 A g <sup>-1</sup><br>/457 mAh g <sup>-1</sup> at 10 A g <sup>-1</sup>     | 100 cycles at 0.5 A g <sup>-1</sup><br>94% retention           | 12        |
| Carbon coated Fe <sub>3</sub> O <sub>4</sub>    | 835 mAh g <sup>-1</sup> at 0.1 A g <sup>-1</sup><br>/570 mAh g <sup>-1</sup> at 1 A g <sup>-1</sup>    | 60 cycles at 0.1 A g <sup>-1</sup><br>~100% retention          | 13        |
| CNT@Fe <sub>3</sub> O <sub>4</sub> @C           | ~900 mAh g <sup>-1</sup> at 0.2 A g <sup>-1</sup><br>/~600 mAh g <sup>-1</sup> at 5 A g <sup>-1</sup>  | 80 cycles at 1 A g <sup>-1</sup><br>67% retention              | 14        |
| Fe <sub>3</sub> O <sub>4</sub> @C-N             | 937 mAh g <sup>-1</sup> at 0.1 A g <sup>-1</sup><br>/490 mAh g <sup>-1</sup> at 1 A g <sup>-1</sup>    | 150 cycles at 0.5 A g <sup>-1</sup><br>102% retention          | 15        |
| Hollow-Fe <sub>3</sub> O <sub>4</sub> @C/GNS    | 870 mAh g <sup>-1</sup> at 0.1 A g <sup>-1</sup><br>/285 mAh g <sup>-1</sup> at 10 A g <sup>-1</sup>   | 200 cycles at 10 A g <sup>-1</sup><br>93% retention            | 16        |

|                                                |                                                                                                        |                                                                |    |
|------------------------------------------------|--------------------------------------------------------------------------------------------------------|----------------------------------------------------------------|----|
| NCW@Fe <sub>3</sub> O <sub>4</sub> @NCS        | 1134 mAh g <sup>-1</sup> at 0.05 A g <sup>-1</sup><br>/426 mAh g <sup>-1</sup> at 10 A g <sup>-1</sup> | 150 cycles at 0.1 A g <sup>-1</sup><br>134% retention          | 17 |
| Fe <sub>3</sub> O <sub>4</sub> /GN             | 825 mAh g <sup>-1</sup> at 0.1 A g <sup>-1</sup><br>/491 mAh g <sup>-1</sup> at 4 A g <sup>-1</sup>    | 70 cycles at 0.1 A g <sup>-1</sup><br>>100% retention          | 18 |
| Yolk-shelled Fe <sub>3</sub> O <sub>4</sub> @C | 1012 mAh g <sup>-1</sup> at 0.1 A g <sup>-1</sup><br>/370 mAh g <sup>-1</sup> at 20 A g <sup>-1</sup>  | 8000 cycles at 10 A g <sup>-1</sup><br>475 mAh g <sup>-1</sup> | 19 |
| Fe <sub>3</sub> O <sub>4</sub> @PPy nanocages  | 1120 mAh g <sup>-1</sup> at 0.1 A g <sup>-1</sup><br>/490 mAh g <sup>-1</sup> at 5 A g <sup>-1</sup>   | 500 cycles at 2 A g <sup>-1</sup><br>652 mAh g <sup>-1</sup>   | 20 |
| Fe <sub>3</sub> O <sub>4</sub> /CNTs/rGO       | 970 mAh g <sup>-1</sup> at 0.2 A g <sup>-1</sup><br>/540 mAh g <sup>-1</sup> at 10 A g <sup>-1</sup>   | 450 cycles at 1 A g <sup>-1</sup><br>>100% retention           | 21 |

---

**Table S2** The sodium storage performance of Fe<sub>3</sub>O<sub>4</sub>/C compared with previous works

| Fe <sub>3</sub> O <sub>4</sub> -based materials           | Rate performance                                                                                                                                        | Cycling performance                                                               | Ref.      |
|-----------------------------------------------------------|---------------------------------------------------------------------------------------------------------------------------------------------------------|-----------------------------------------------------------------------------------|-----------|
| Fe <sub>3</sub> O <sub>4</sub> /C                         | 339 mAh g <sup>-1</sup> at 0.05 A g <sup>-1</sup><br>/195 mAh g <sup>-1</sup> at 1 A g <sup>-1</sup><br>/138 mAh g <sup>-1</sup> at 5 A g <sup>-1</sup> | 200 cycles at 0.1 A g <sup>-1</sup><br>93.5% retention<br>277 mAh g <sup>-1</sup> | This work |
| 3D-0D graphene-Fe <sub>3</sub> O <sub>4</sub> QDs         | 316 mAh g <sup>-1</sup> at 0.1 A g <sup>-1</sup><br>/62 mAh g <sup>-1</sup> at 5 A g <sup>-1</sup>                                                      | 200 cycles at 0.05 A g <sup>-1</sup><br>71% retention                             | 22        |
| Porous carbon-encapsulated Fe <sub>3</sub> O <sub>4</sub> | 510 mAh g <sup>-1</sup> at 0.2 A g <sup>-1</sup><br>/163 mAh g <sup>-1</sup> at 5 A g <sup>-1</sup>                                                     | 100 cycles at 0.5 A g <sup>-1</sup><br>309 mAh g <sup>-1</sup>                    | 23        |
| Fe <sub>3</sub> O <sub>4</sub> @CNT                       | 453 mAh g <sup>-1</sup> at 0.2 A g <sup>-1</sup><br>/118 mAh g <sup>-1</sup> at 3.2 A g <sup>-1</sup>                                                   | 300 cycles at 0.1 A g <sup>-1</sup><br>377 mAh g <sup>-1</sup>                    | 24        |
| Fe <sub>3</sub> O <sub>4</sub> -QDs@CNs                   | 362 mAh g <sup>-1</sup> at 0.1 A g <sup>-1</sup><br>/290 mAh g <sup>-1</sup> at 2 A g <sup>-1</sup>                                                     | 1000 cycles at 1 A g <sup>-1</sup><br>70% retention                               | 25        |
| Fe <sub>3</sub> O <sub>4</sub> /C                         | 328 mAh g <sup>-1</sup> at 0.3 A g <sup>-1</sup><br>/213 mAh g <sup>-1</sup> at 1 A g <sup>-1</sup>                                                     | 60 cycles at 0.1 A g <sup>-1</sup><br>380 mAh g <sup>-1</sup>                     | 26        |
| Fe <sub>3</sub> O <sub>4</sub> /graphene                  | ~200 mAh g <sup>-1</sup> at 0.2 A g <sup>-1</sup><br>/120 mAh g <sup>-1</sup> at 2 A g <sup>-1</sup>                                                    | 260 cycles at 0.1 A g <sup>-1</sup><br>213 mAh g <sup>-1</sup>                    | 27        |
| RGO/Fe <sub>3</sub> O <sub>4</sub>                        | 246 mAh g <sup>-1</sup> at 0.02 A g <sup>-1</sup><br>/42 mAh g <sup>-1</sup> at 1 A g <sup>-1</sup>                                                     | 200 cycles at 0.04 A g <sup>-1</sup><br>208 mAh g <sup>-1</sup>                   | 28        |
| C/Fe <sub>3</sub> O <sub>4</sub> embedded on CNTs         | ~320 mAh g <sup>-1</sup> at 0.05 A g <sup>-1</sup><br>/196 mAh g <sup>-1</sup> at 2.4 A g <sup>-1</sup>                                                 | 50 cycles at 0.05 A g <sup>-1</sup><br>~320 mAh g <sup>-1</sup>                   | 29        |
| Fe <sub>3</sub> O <sub>4</sub> nanoparticles              | 248 mAh g <sup>-1</sup> at 0.083 A g <sup>-1</sup><br>/60 mAh g <sup>-1</sup> at 1.67 A g <sup>-1</sup>                                                 | 50 cycles at 0.083 A g <sup>-1</sup><br>248 mAh g <sup>-1</sup>                   | 30        |
| Fe <sub>3</sub> O <sub>4</sub> materials                  | 250 mAh g <sup>-1</sup> at 0.055 A g <sup>-1</sup>                                                                                                      | 10 cycles at 0.055 A g <sup>-1</sup><br>250 mAh g <sup>-1</sup>                   | 31        |

**Table S3** The fitted Kinetic parameters of Fe<sub>3</sub>O<sub>4</sub>/C electrodes in LIBs and NIBs.

|                                           | R <sub>s</sub> (Ω) | R <sub>ct</sub> (Ω) | C <sub>dl</sub> |        |
|-------------------------------------------|--------------------|---------------------|-----------------|--------|
|                                           |                    |                     | T               | P      |
| Fe <sub>3</sub> O <sub>4</sub> /C in LIBs | 61.77              | 162.6               | 2.055e-5        | 0.6985 |
| Fe <sub>3</sub> O <sub>4</sub> /C in NIBs | 40.44              | 445.8               | 1.3092e-5       | 0.7893 |

## References

1. Y. Wu, Y. Wei, J. P. Wang, K. L. Jiang and S. S. Fan, *Nano Lett.*, 2013, **13**, 818-823.
2. W. Wei, S. B. Yang, H. X. Zhou, I. Lieberwirth, X. L. Feng and K. Mullen, *Adv. Mater.*, 2013, **25**, 2909-2914.
3. L. Li, A. Kovalchuk, H. L. Fei, Z. W. Peng, Y. L. Li, N. D. Kim, C. S. Xiang, Y. Yang, G. D. Ruan and J. M. Tour, *Adv. Energy Mater.*, 2015, **5**.
4. Y. Chen, B. H. Song, M. Li, L. Lu and J. M. Xue, *Adv. Funct. Mater.*, 2014, **24**, 319-326.
5. L. L. Wang, J. W. Liang, Y. C. Zhu, T. Mei, X. Zhang, Q. Yang and Y. T. Qian, *Nanoscale*, 2013, **5**, 3627-3631.
6. J. S. Luo, J. L. Liu, Z. Y. Zeng, C. F. Ng, L. J. Ma, H. Zhang, J. Y. Lin, Z. X. Shen and H. J. Fan, *Nano Lett.*, 2013, **13**, 6136-6143.
7. C. N. He, S. Wu, N. Q. Zhao, C. S. Shi, E. Z. Liu and J. J. Li, *Acs Nano*, 2013, **7**, 4459-4469.
8. J. X. He, S. Y. Zhao, Y. P. Lian, M. J. Zhou, L. D. Wang, B. Ding and S. Z. Cui, *Electrochim. Acta*, 2017, **229**, 306-315.
9. Q. H. Wu, R. F. Zhao, X. Zhang, W. L. Li, R. H. Xu, G. W. Diao and M. Chen, *J. Power Sources*, 2017, **359**, 7-16.
10. L. Liu, H. Zhang, S. W. Liu, H. M. Yao, H. Q. Hou and S. L. Chen, *Electrochim. Acta*, 2016, **219**, 356-362.
11. L. Zhao, M. M. Gao, W. B. Yue, Y. Jiang, Y. Wang, Y. Ren and F. Q. Hu, *Acs*

- Appl. Mater. Interfaces*, 2015, **7**, 9709-9715.
12. F. X. Ma, H. Hu, H. B. Wu, C. Y. Xu, Z. C. Xu, L. Zhen and X. W. Lou, *Adv. Mater.*, 2015, **27**, 4097-4101.
  13. P. P. Lv, H. L. Zhao, Z. P. Zeng, J. Wang, T. H. Zhang and X. W. Li, *J. Power Sources*, 2014, **259**, 92-97.
  14. Y. Zhang, Y. K. Tang, S. S. Gao, D. Z. Jia, J. H. Ma and L. Liu, *Acs Appl. Mater. Interfaces*, 2017, **9**, 1453-1458.
  15. Q. H. Wu, R. F. Zhao, W. J. Liu, X. Zhang, X. Shen, W. L. Li, G. W. Diao and M. Chen, *J. Power Sources*, 2017, **344**, 74-84.
  16. Y. T. Zuo, G. Wang, J. Peng, G. Li, Y. Q. Ma, F. Yu, B. Dai, X. H. Guo and C. P. Wong, *J. Mater. Chem. A*, 2016, **4**, 2453-2460.
  17. Y. Wang, Q. T. Qu, Y. Y. Han, T. Gao, J. Shao, Z. C. Zuo, W. J. Liu, Q. Shi and H. H. Zheng, *J. Mater. Chem. A*, 2016, **4**, 10314-10320.
  18. J. Q. Jiao, W. D. Qiu, J. G. Tang, L. P. Chen and L. Y. Jing, *Nano Res.*, 2016, **9**, 1256-1266.
  19. Z. Liu, X. Y. Yu and U. Paik, *Adv. Energy Mater.*, 2016, **6**.
  20. J. Liu, X. J. Xu, R. Z. Hu, L. C. Yang and M. Zhu, *Adv. Energy Mater.*, 2016, **6**.
  21. Y. Yang, J. Q. Li, D. Q. Chen and J. B. Zhao, *Acs Appl. Mater. Interfaces*, 2016, **8**, 26730-26739.
  22. H. Liu, M. Q. Jia, Q. Z. Zhu, B. Cao, R. J. Chen, Y. Wang, F. Wu and B. Xu, *Acs Appl. Mater. Interfaces*, 2016, **8**, 26878-26885.



23. Y. Zhou, W. Sun, X. Rui, Y. Zhou, W. J. Ng, Q. Yan and E. Fong, *Nano Energy*, 2016, **21**, 71-79.
24. X. Wang, X. Liu, G. Wang, Y. Xia and H. Wang, *J. Mater. Chem. A*, 2016, **4**, 18532-18542.
25. S. Liu, Y. Wang, Y. Dong, Z. Zhao, Z. Wang and J. Qiu, *ChemElectroChem*, 2016, **3**, 38-44.
26. G. Li, C. Wang, L. Shao, L. Zhou, C. Yang, M. Ren, X. Xi and L. Yang, *CrystEngComm*, 2016, **18**, 9231-9235.
27. Y. Fu, Q. Wei, X. Wang, G. Zhang, H. Shu, X. Yang, A. C. Tavares and S. Sun, *Rsc Adv.*, 2016, **6**, 16624-16633.
28. S. Zhang, W. Li, B. Tan, S. Chou, Z. Li and S. Dou, *J. Mater. Chem. A*, 2015, **3**, 4793-4798.
29. D.-Y. Park and S.-T. Myung, *Acs Appl. Mater. Interfaces*, 2014, **6**, 11749-11757.
30. P. R. Kumar, Y. H. Jung, K. K. Bharathi, C. H. Lim and D. K. Kim, *Electrochim. Acta*, 2014, **146**, 503-510.
31. S. Hariharan, K. Saravanan, V. Ramar and P. Balaya, *Phys. Chem. Chem. Phys.*, 2013, **15**, 2945-2953.
